# Supplementary material
Source: HighWire-hosted journal article supplement (https://mbio.asm.org/content/5/2/e00969-14)

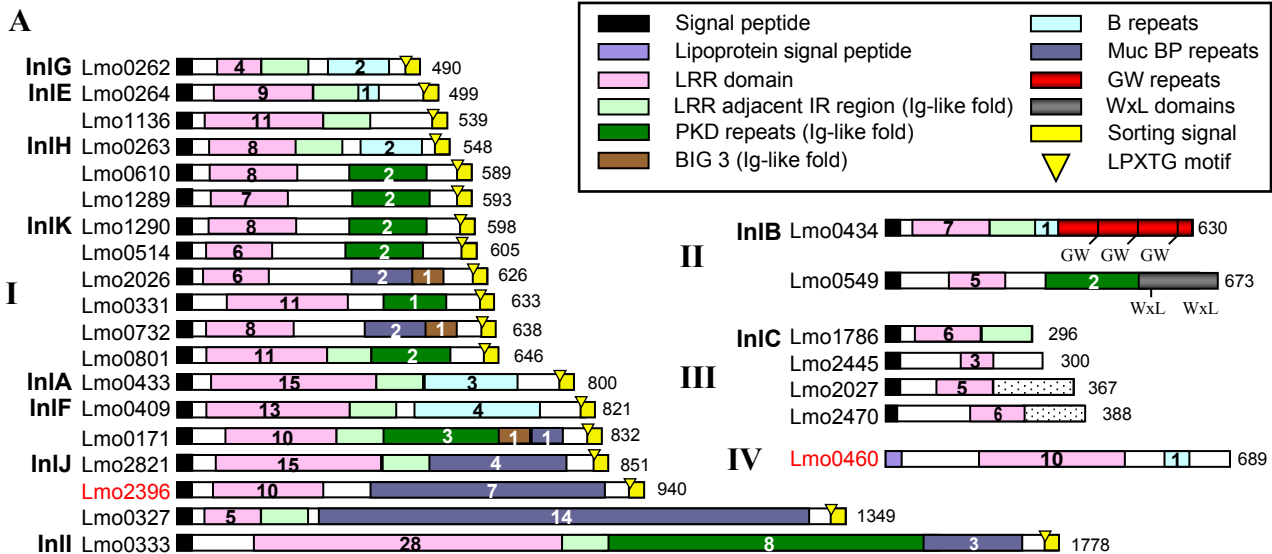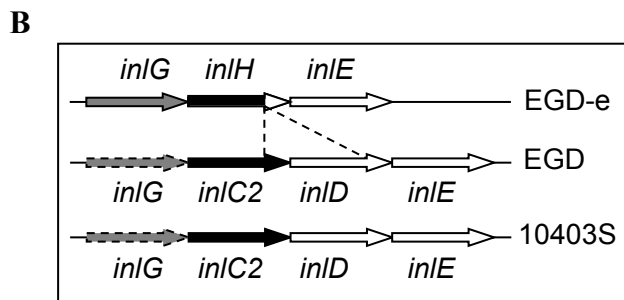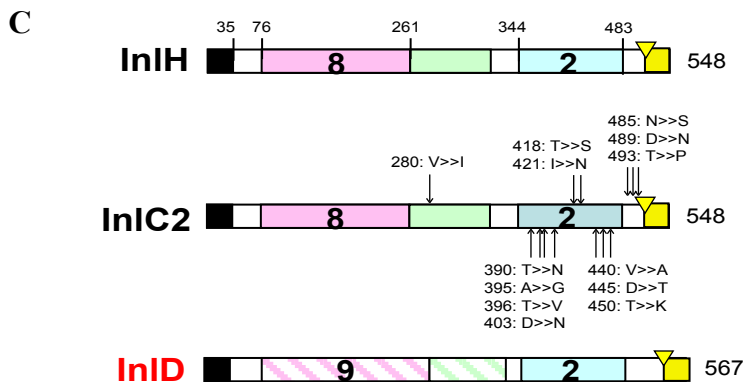

Supplement: inline-supplementary-material-5 [file inline-supplementary-material-5.pdf]
